# Supplementary material for: TGFβ Drives Metabolic Perturbations during Epithelial Mesenchymal Transition in Pancreatic Cancer: TGFβ Induced EMT in PDAC
Source: MDPI journal article supplement (doi:10.3390/cancers13246204), 2021-12-09
Supplement: s1 [file s1]

*Supplementary materials*

# **TGF $\beta$ Drives Metabolic Perturbations during Epithelial Mesenchymal Transition in Pancreatic Cancer: TGF $\beta$ Induced EMT in PDAC**

Meena U. Rajagopal, Shivani Bansal, Prabhjit Kaur, Shreyans K. Jain, Tatiana Altadil, Charles P. Hinzman, Yaoxiang Li, Joanna Moulton, Baldev Singh, Sunil Bansal, Siddheshwar Kisan Chauthi, Rajbir Singh, Partha P. Banerjee, Mark Mapstone, Massimo S. Fiandaca, Howard J. Federoff, Keith Unger, Jill Smith and Amrita K. Cheema

**Table S1.** Statistical analysis of untargeted profiling data comparing PANC-1 cells treated with either TGF $\beta$  or DMSO. Up (green up arrow) or down (red down arrow), regulation of that particular metabolite or lipid.

| m/z_rt           | Mode | Fold Change<br>(TGF $\beta$ /control) | log2(FC) | p.value    | -log10(p) |
|------------------|------|---------------------------------------|----------|------------|-----------|
| 296.0687_0.435   | Pos  | ↓ 0.16607                             | -2.5902  | 8.84E-09   | 8.0538    |
| 258.1075_0.4803  | Pos  | ↓ 0.22128                             | -2.176   | 3.69E-07   | 6.4331    |
| 156.0757_0.4544  | Pos  | ↓ 0.24367                             | -2.037   | 7.87E-06   | 5.1043    |
| 249.0518_0.4514  | Pos  | ↓ 0.29591                             | -1.7568  | 1.80E-05   | 4.7439    |
| 136.0751_0.527   | Pos  | ↓ 0.23503                             | -2.0891  | 1.83E-05   | 4.7365    |
| 118.087_0.4839   | Pos  | ↓ 0.35502                             | -1.494   | 3.27E-05   | 4.4849    |
| 148.0613_0.4811  | Pos  | ↓ 0.35525                             | -1.4931  | 5.52E-05   | 4.2582    |
| 182.0803_0.5316  | Pos  | ↓ 0.21392                             | -2.2249  | 7.50E-05   | 4.1247    |
| 533.4908_9.9742  | Pos  | ↑ 2.3083                              | 1.2068   | 0.00024436 | 3.612     |
| 146.0602_1.4642  | Pos  | ↓ 0.15239                             | -2.7142  | 0.00031384 | 3.5033    |
| 132.1015_0.5914  | Pos  | ↓ 0.18614                             | -2.4255  | 0.00031946 | 3.4956    |
| 357.2979_8.2775  | Pos  | ↑ 4.4859                              | 2.1654   | 0.00035108 | 3.4546    |
| 294.1458_0.6497  | Pos  | ↓ 0.15862                             | -2.6564  | 0.00053074 | 3.2751    |
| 356.0734_3.2743  | Pos  | ↓ 0.095916                            | -3.3821  | 0.00058299 | 3.2343    |
| 159.092_1.4567   | Pos  | ↓ 0.23575                             | -2.0847  | 0.00078667 | 3.1042    |
| 245.1836_2.5461  | Pos  | ↓ 0.10035                             | -3.3169  | 0.00083215 | 3.0798    |
| 166.0866_0.8059  | Pos  | ↓ 0.18126                             | -2.4638  | 0.00088138 | 3.0548    |
| 238.0873_11.5319 | Pos  | ↑ 4.295                               | 2.1027   | 0.0010286  | 2.9877    |
| 340.0513_0.469   | Pos  | ↓ 0.46859                             | -1.0936  | 0.0011681  | 2.9325    |
| 690.5397_9.8908  | Pos  | ↑ 2.2551                              | 1.1732   | 0.0013408  | 2.8726    |
| 308.093_0.5205   | Pos  | ↓ 0.27296                             | -1.8733  | 0.0028454  | 2.5458    |
| 149.0588_0.7987  | Pos  | ↓ 0.30979                             | -1.6906  | 0.0028635  | 2.5431    |
| 179.0723_0.4547  | Pos  | ↓ 0.28754                             | -1.7982  | 0.0037635  | 2.4244    |
| 538.5215_9.9984  | Pos  | ↑ 2.6798                              | 1.4221   | 0.0039303  | 2.4056    |
| 489.3579_6.7811  | Pos  | ↓ 0.41328                             | -1.2748  | 0.0046807  | 2.3297    |
| 229.1551_1.373   | Pos  | ↓ 0.1647                              | -2.6021  | 0.0052486  | 2.28      |
| 121.0858_0.804   | Pos  | ↓ 0.34553                             | -1.5331  | 0.0067573  | 2.1702    |
| 300.289_6.2419   | Pos  | ↑ 2.32                                | 1.2141   | 0.0070793  | 2.15      |
| 175.1188_0.4396  | Pos  | ↓ 0.14333                             | -2.8026  | 0.0092466  | 2.034     |
| 494.3244_6.1714  | Pos  | ↑ 3.9183                              | 1.9702   | 0.010677   | 1.9715    |
| 828.6794_10.1245 | Pos  | ↑ 2.2202                              | 1.1507   | 0.010824   | 1.9656    |

|                  |     |            |         |           |        |
|------------------|-----|------------|---------|-----------|--------|
| 283.272_6.2684   | Pos | ↑ 2.2178   | 1.1492  | 0.011167  | 1.9521 |
| 516.3052_6.1722  | Pos | ↑ 2.6164   | 1.3876  | 0.015384  | 1.8129 |
| 674.5184_9.1825  | Pos | ↑ 2.2545   | 1.1728  | 0.022835  | 1.6414 |
| 650.6414_10.1813 | Pos | ↑ 2.3569   | 1.2369  | 0.028374  | 1.5471 |
| 353.0485_3.2719  | Neg | ↓ 0.011457 | -6.4477 | 1.70E-11  | 10.77  |
| 258.1451_1.0373  | Neg | ↓ 0.051637 | -4.2755 | 8.56E-10  | 9.0674 |
| 244.1293_1.0471  | Neg | ↓ 0.062445 | -4.0013 | 2.73E-09  | 8.5644 |
| 259.1315_1.1816  | Neg | ↓ 0.10376  | -3.2686 | 1.21E-08  | 7.9173 |
| 221.0925_1.5383  | Neg | ↓ 0.083677 | -3.579  | 3.64E-08  | 7.4386 |
| 306.0762_0.5185  | Neg | ↓ 0.35239  | -1.5047 | 3.95E-08  | 7.4039 |
| 251.1022_1.3762  | Neg | ↓ 0.15587  | -2.6816 | 3.18E-07  | 6.4977 |
| 187.1079_1.1188  | Neg | ↓ 0.14109  | -2.8254 | 2.18E-06  | 5.6614 |
| 203.0817_1.4524  | Neg | ↓ 0.16919  | -2.5633 | 2.90E-06  | 5.5383 |
| 277.1548_2.8806  | Neg | ↓ 0.1123   | -3.1546 | 6.91E-06  | 5.1603 |
| 271.0691_1.4515  | Neg | ↓ 0.1959   | -2.3518 | 3.24E-05  | 4.4893 |
| 540.0504_0.5142  | Neg | ↓ 0.48286  | -1.0503 | 0.0002233 | 3.6511 |
| 164.0709_0.8043  | Neg | ↓ 0.27744  | -1.8498 | 0.0002899 | 3.5378 |
| 333.0497_1.4478  | Neg | ↓ 0.3532   | -1.5014 | 0.0013728 | 2.8624 |
| 154.0613_0.4364  | Neg | ↓ 0.23487  | -2.0901 | 0.0015746 | 2.8028 |
| 188.0348_0.5824  | Neg | ↓ 0.38685  | -1.3701 | 0.0016429 | 2.7844 |
| 299.2576_8.8985  | Neg | ↑ 27.541   | 4.7835  | 0.0025282 | 2.5972 |
| 130.0861_0.6025  | Neg | ↓ 0.26197  | -1.9325 | 0.0037651 | 2.4242 |
| 360.1399_0.5988  | Neg | ↓ 0.34372  | -1.5407 | 0.0069518 | 2.1579 |
| 180.0656_0.5512  | Neg | ↓ 0.30484  | -1.7139 | 0.011851  | 1.9262 |
| 148.0426_0.7323  | Neg | ↓ 0.36314  | -1.4614 | 0.017304  | 1.7619 |
| 593.2703_5.9892  | Neg | ↑ 3.3855   | 1.7594  | 0.022935  | 1.6395 |
| 354.1465_8.0716  | Neg | ↑ 6.4597   | 2.6915  | 0.03528   | 1.4525 |
| 253.2166_8.0857  | Neg | ↑ 7.7662   | 2.9572  | 0.042866  | 1.3679 |

**Table S2.** Full list of tandem MS validated metabolites with details

| Metabolite              | m/z      | Mode     | Formula       | Metabolite ID | p-value        | CID fragments                          |
|-------------------------|----------|----------|---------------|---------------|----------------|----------------------------------------|
| Hypoxanthine            | 137.0470 | Positive | C5H4N4O       | HMDB00157     | 0.000018300000 | 94.04, 110.03, 119.03, 120.02          |
| D-Glutamic acid         | 148.0612 | Positive | C5H9NO4       | HMDB03339     | 0.000055200000 | 84.08, 130.08                          |
| L-Arginine              | 175.1190 | Positive | C6H14N4O2     | HMDB03416     | 0.009250000000 | 70.06, 116.06, 130.09, 158.08          |
| D-Tyrosine              | 182.0800 | Positive | C9H11NO3      | C06420        | 0.000075000000 | 77.03, 95.04, 119.04, 136.07, 165.05   |
| Leucyl-leucine          | 245.1844 | Positive | C12H24N2O3    | C11332        | 0.000832000000 | 86.09, 132.09                          |
| Glutathione             | 308.0930 | Positive | C10H17N3O6S   | HMDB00125     | 0.002850000000 | 76.02, 84.04, 116.01, 162.02, 291.06   |
| Retinoic acid           | 301.2150 | Positive | C20H30O2      | HMDB01852     | 0.002530000000 | 201.2, 123.07                          |
| D-Aspartic acid         | 132.0303 | Negative | C4H7NO4       | HMDB06483     | 0.000000000017 | 88.04, 115.00                          |
| L-Phenylalanine         | 164.0709 | Negative | C9H11NO2      | HMDB00159     | 0.000289000000 | 103.05, 147.04                         |
| D-Tryptophan            | 203.0817 | Negative | C11H12N2O2    | HMDB13609     | 0.000002900000 | 74.02, 116.050, 142.06, 159.09, 186.05 |
| Pseudouridine           | 243.0618 | Negative | C9H12N2O6     | HMDB00767     | 0.000000002730 | 110.02, 140.03, 153.02                 |
| Prostaglandin E2        | 333.2057 | Negative | C20H30O4      | HMDB02710     | 0.003530000000 | 113.09, 175.11, 235.13, 271.20, 315.19 |
| Cyclic ADP-ribose       | 540.0504 | Negative | C15H21N5O13P2 | C13050        | 0.000223000000 | 134.04, 158.92, 272.95, 328.04         |
| UDP-N-acetylglucosamine | 606.0745 | Negative | C17H27N3O17P2 | HMDB00290     | 0.002290000000 | 158.92, 176.93, 282.03, 384.98, 402.99 |

**Table S3.** Statistical analysis results for the amino acid quantitation by targeted MRM-MS using UPLC-TQS comparing PANC-1 cells treated either with TGF $\beta$  or DMSO. Up (green up arrow) or down (red down arrow), regulation of that particular metabolite or lipid.

| Metabolite | <i>p</i> value | FDR       | Fold Change<br>(TGF $\beta$ /control) | log2(FC)  |
|------------|----------------|-----------|---------------------------------------|-----------|
| Gln        | 4.72E-05       | 0.0014149 | ↑ 2.9811                              | 1.5759    |
| Glu        | 8.03E-04       | 0.012044  | ↑ 1.5389                              | 0.62186   |
| Val        | 0.0029031      | 0.021742  | ↑ 1.5017                              | 0.58658   |
| Ile        | 0.0033284      | 0.021742  | ↑ 1.5307                              | 0.61419   |
| Taurine    | 0.0036237      | 0.021742  | ↑ 1.778                               | 0.83025   |
| Arg        | 0.0080191      | 0.031408  | ↑ 1.2871                              | 0.36413   |
| Leu        | 0.0082324      | 0.031408  | ↑ 1.4078                              | 0.49346   |
| His        | 0.0083755      | 0.031408  | ↑ 1.5471                              | 0.62959   |
| Tyr        | 0.010348       | 0.034495  | ↑ 1.4493                              | 0.53536   |
| Phe        | 0.015956       | 0.047319  | ↑ 1.4367                              | 0.52278   |
| Gly        | 0.01735        | 0.047319  | ↑ 1.5906                              | 0.66955   |
| Pro        | 0.021          | 0.05093   | ↑ 1.4255                              | 0.51146   |
| Met        | 0.022069       | 0.05093   | ↑ 1.355                               | 0.43829   |
| Trp        | 0.025753       | 0.055186  | ↑ 1.3925                              | 0.47771   |
| ADMA       | 0.1077         | 0.2154    | ↑ 1.3382                              | 0.42025   |
| Lys        | 0.12339        | 0.23136   | ↑ 1.3643                              | 0.44815   |
| Thr        | 0.14745        | 0.26021   | ↑ 1.1783                              | 0.23665   |
| Ala        | 0.23097        | 0.38494   | ↑ 1.1905                              | 0.25157   |
| Dopamine   | 0.25913        | 0.40838   | ↓ 0.8178                              | -0.29019  |
| Serotonin  | 0.29821        | 0.40838   | ↑ 1.0058                              | 0.0083819 |
| Asn        | 0.29823        | 0.40838   | ↑ 1.1611                              | 0.2155    |
| Sarcosine  | 0.29948        | 0.40838   | ↑ 1.1421                              | 0.19166   |
| Ser        | 0.37419        | 0.47369   | ↑ 1.0433                              | 0.061218  |
| Putrescine | 0.37895        | 0.47369   | ↓ 0.97103                             | -0.042418 |
| Carnosine  | 0.4922         | 0.55746   | ↓ 0.84525                             | -0.24255  |
| Spermidine | 0.50088        | 0.55746   | ↓ 0.95456                             | -0.067088 |
| Creatinine | 0.50171        | 0.55746   | ↑ 1.1873                              | 0.2477    |
| Asp        | 0.88612        | 0.94223   | ↑ 1.0068                              | 0.0098242 |
| c4-OH-Pro  | 0.91082        | 0.94223   | ↓ 0.77529                             | -0.36719  |
| Cit        | 0.98536        | 0.98536   | ↑ 1.0037                              | 0.0052629 |

**Table S4.** List of significantly dysregulated targeted MRM-MS data using QTRAP 7500 comparing PANC-1 cells treated either with TGF $\beta$  or DMSO. Up (green up arrow) or down (red down arrow), regulation of that particular metabolite or lipid.

| Metabolite_mode                 | p value  | FDR       | Fold Change (TGF $\beta$ /control) | log2(FC) |
|---------------------------------|----------|-----------|------------------------------------|----------|
| Malate_Neg                      | 1.05E-06 | 2.47E-04  | ↑ 1.933                            | 0.95084  |
| Uridine 5-Diphosphate_Neg       | 1.06E-06 | 2.47E-04  | ↑ 1.7387                           | 0.79797  |
| 2-Hydroxyglutarate_Neg          | 1.70E-06 | 2.63E-04  | ↑ 2.4267                           | 1.279    |
| O-Acetylserine_Neg              | 4.99E-06 | 5.81E-04  | ↑ 2.3889                           | 1.2564   |
| IDP_Neg                         | 8.82E-06 | 7.25E-04  | ↑ 1.7239                           | 0.78566  |
| Guanosine Diphosphate_pos       | 9.35E-06 | 7.25E-04  | ↑ 1.5676                           | 0.64859  |
| UDP-Glucose_Neg                 | 1.20E-05 | 7.47E-04  | ↑ 1.574                            | 0.65442  |
| N-Acetylalanine_Neg             | 1.28E-05 | 7.47E-04  | ↑ 1.5636                           | 0.64487  |
| UDP-Glucuronate_Neg             | 1.76E-05 | 9.07E-04  | ↑ 1.8561                           | 0.89224  |
| Proline_pos                     | 2.05E-05 | 9.53E-04  | ↑ 1.5291                           | 0.61272  |
| ADP_Neg                         | 2.75E-05 | 0.0011055 | ↑ 1.7683                           | 0.82233  |
| UDP-N-Acetylamino Sugars_Neg    | 2.85E-05 | 0.0011055 | ↑ 1.4365                           | 0.52256  |
| L-2-Hydroxyglutaric Acid_Neg    | 3.73E-05 | 0.0013339 | ↑ 2.7022                           | 1.4341   |
| Glutamate_pos                   | 7.36E-05 | 0.0024461 | ↑ 1.8675                           | 0.90114  |
| Phenylpropionic Acid_Neg        | 8.56E-05 | 0.0025711 | ↑ 1.7006                           | 0.76604  |
| Threonic Acid_Neg               | 8.85E-05 | 0.0025711 | ↑ 1.5477                           | 0.63015  |
| 2-Ketoisovalerate_Neg           | 9.57E-05 | 0.0026059 | ↑ 1.3226                           | 0.40342  |
| Guanidineacetate_Neg            | 1.10E-04 | 0.0026059 | ↑ 1.7013                           | 0.76664  |
| L-Glutamic Acid_pos             | 1.11E-04 | 0.0026059 | ↑ 1.6645                           | 0.73511  |
| Uridine Diphosphate Glucose_Neg | 1.14E-04 | 0.0026059 | ↑ 1.5165                           | 0.60075  |
| Oxoglutarate_Neg                | 1.18E-04 | 0.0026059 | ↑ 2.1598                           | 1.1109   |
| Lactate_Neg                     | 1.38E-04 | 0.0029164 | ↑ 1.5093                           | 0.59386  |
| Uridine 5-Diphosphate_pos       | 1.45E-04 | 0.0029296 | ↑ 1.5156                           | 0.59993  |
| Isocitrate_Neg                  | 2.18E-04 | 0.0042168 | ↑ 2.0851                           | 1.0601   |
| Fumarate_Neg                    | 2.66E-04 | 0.0049473 | ↑ 1.4206                           | 0.50651  |
| CDP_pos                         | 2.82E-04 | 0.0050382 | ↑ 1.5132                           | 0.59756  |
| Betaine_pos_1                   | 3.07E-04 | 0.0051699 | ↑ 1.3802                           | 0.46484  |
| ADP_pos                         | 3.11E-04 | 0.0051699 | ↑ 1.436                            | 0.52209  |
| Norepinephrine_pos              | 3.47E-04 | 0.0055613 | ↑ 1.5814                           | 0.66119  |
| Alpha-Ketoisovaleric Acid_pos   | 4.18E-04 | 0.0064752 | ↑ 1.2975                           | 0.37577  |
| N-Acetylglycine_Neg             | 4.39E-04 | 0.00659   | ↑ 1.5721                           | 0.65269  |
| Glycerophosphocholine_pos       | 4.99E-04 | 0.0072486 | ↑ 1.4772                           | 0.5629   |
| L-Tryptophan_Neg                | 6.13E-04 | 0.0086227 | ↑ 1.3285                           | 0.40983  |
| Phenylacetylglycine_pos         | 6.30E-04 | 0.0086227 | ↑ 1.3589                           | 0.44245  |
|                                 |          |           | ↑                                  |          |

|                               |           |           |   |         |          |
|-------------------------------|-----------|-----------|---|---------|----------|
| Homocysteic Acid_Neg          | 6.79E-04  | 0.0090156 | ↑ | 1.8682  | 0.90166  |
| 2-Phosphoglycerate_pos        | 7.00E-04  | 0.0090156 | ↓ | 0.68932 | -0.53674 |
| dGDP_Neg                      | 7.17E-04  | 0.0090156 | ↑ | 1.5765  | 0.65671  |
| Carbamoyl Phosphates_Neg      | 7.51E-04  | 0.0091839 | ↑ | 1.6285  | 0.70357  |
| Gluconate_Neg                 | 8.10E-04  | 0.009657  | ↑ | 2.2283  | 1.1559   |
| 3-Hydroxypropionic Acid_Neg   | 8.49E-04  | 0.0098683 | ↑ | 1.4833  | 0.56884  |
| TAG506_FA204NH4               | 2.28E-05  | 0.0099907 | ↓ | 0.46719 | -1.0979  |
| TAG505_FA204NH4               | 3.22E-05  | 0.0099907 | ↓ | 0.54417 | -0.87786 |
| Pantothenic Acid_Neg          | 9.07E-04  | 0.01029   | ↑ | 1.4459  | 0.53193  |
| Acetylserine_pos              | 9.49E-04  | 0.010511  | ↑ | 1.5453  | 0.62789  |
| DAG161_183NH4                 | 5.53E-05  | 0.011438  | ↓ | 0.69896 | -0.51673 |
| Ascorbate_Neg                 | 0.001221  | 0.013204  | ↑ | 1.806   | 0.85278  |
| Phosphoenolpyruvate_Neg       | 0.0014108 | 0.01491   | ↓ | 0.80335 | -0.31589 |
| Deoxyadenosine                | 0.0015563 | 0.015753  | ↑ | 1.4485  | 0.5346   |
| Triphosphate_pos              |           |           | ↑ |         |          |
| UDP_pos                       | 0.0015584 | 0.015753  | ↑ | 1.5316  | 0.61501  |
| Alpha-Tocopherol_Neg          | 0.0016679 | 0.016501  | ↑ | 1.4737  | 0.55944  |
| Glyceraldehyde_Neg            | 0.0018865 | 0.018275  | ↑ | 1.4471  | 0.53315  |
| Oxalate_Neg                   | 0.0020284 | 0.019139  | ↑ | 1.5304  | 0.61394  |
| NADP_Neg                      | 0.0020611 | 0.019139  | ↑ | 2.3418  | 1.2276   |
| 3-Methylamino-L-Alanine_pos_1 | 0.0020991 | 0.019139  | ↑ | 1.3049  | 0.38399  |
| Erythronic Acid_Neg           | 0.002488  | 0.022248  | ↑ | 1.4637  | 0.54963  |
| cGMP_pos                      | 0.00261   | 0.022899  | ↑ | 1.3621  | 0.44587  |
| Betaine_pos_2                 | 0.0027864 | 0.023994  | ↑ | 1.2857  | 0.3625   |
| Ribose_Neg                    | 0.0028802 | 0.024351  | ↑ | 2.5699  | 1.3617   |
| Maleic Acid_Neg               | 0.0031468 | 0.025848  | ↑ | 1.2952  | 0.37315  |
| ADP-Glucose_pos               | 0.0031685 | 0.025848  | ↑ | 1.3514  | 0.43447  |
| DAG161_182NH4                 | 1.75E-04  | 0.027095  | ↓ | 0.75793 | -0.39987 |
| D-Glucose_Neg                 | 0.0035755 | 0.02825   | ↑ | 1.6759  | 0.74493  |
| XMP                           | 0.0035844 | 0.02825   | ↓ | 0.58653 | -0.76973 |
| Indole-3-Propionate_Neg       | 0.0037033 | 0.028701  | ↑ | 1.5607  | 0.64217  |
| Cresol-Sulfate_Neg            | 0.0047303 | 0.036059  | ↑ | 1.4304  | 0.51647  |
| GTP_Neg                       | 0.0055858 | 0.041296  | ↑ | 1.8377  | 0.87792  |
| N-Acetyl-Aspartate_Neg        | 0.0055949 | 0.041296  | ↑ | 1.6317  | 0.7064   |
| Creatine_pos                  | 0.0057613 | 0.04186   | ↑ | 1.3472  | 0.42997  |
| 2-Oxobutanoate_Neg            | 0.0064735 | 0.045974  | ↑ | 1.2441  | 0.31512  |
| Fructose_Neg                  | 0.0065254 | 0.045974  | ↑ | 1.5087  | 0.59327  |
| L-Glutamine_pos               | 0.0067669 | 0.046964  | ↑ | 2.0261  | 1.0187   |

|                               |           |          |   |         |          |
|-------------------------------|-----------|----------|---|---------|----------|
| Butylcarnitine_pos            | 0.0068958 | 0.047155 | ↑ | 1.3317  | 0.41332  |
| Pyridoxamine_pos              | 0.0071769 | 0.048366 | ↑ | 1.8287  | 0.87081  |
| NADP_pos                      | 0.0075473 | 0.049943 | ↑ | 2.0128  | 1.0092   |
| XMP_pos                       | 0.0076258 | 0.049943 | ↓ | 0.57985 | -0.78624 |
| NMN_Neg                       | 0.0084741 | 0.054729 | ↑ | 1.575   | 0.65534  |
| N-Acetylmethionine_Neg        | 0.009507  | 0.060558 | ↑ | 1.2906  | 0.36808  |
| Deoxyadenosine                | 0.009775  | 0.061412 | ↑ | 1.6509  | 0.72325  |
| Triphosphate_Neg              |           |          | ↑ |         |          |
| Dimethylarginine_pos          | 0.0099052 | 0.061412 | ↑ | 1.4378  | 0.52388  |
| L-Lysine_pos                  | 0.010338  | 0.063255 | ↓ | 1.8923  | 0.92017  |
| DAG182_226NH4                 | 5.28E-04  | 0.064131 | ↓ | 0.60264 | -0.73064 |
| TAG505_FA183NH4               | 6.21E-04  | 0.064131 | ↓ | 0.64897 | -0.62378 |
| DAG161_202NH4                 | 7.58E-04  | 0.067108 | ↓ | 0.69206 | -0.53103 |
| TAG548_FA183NH4               | 9.39E-04  | 0.072736 | ↓ | 0.56073 | -0.83461 |
| Arabitol_Neg                  | 0.012114  | 0.073159 | ↑ | 1.5396  | 0.62258  |
| DAG161_204NH4                 | 0.0012098 | 0.075264 | ↓ | 0.63413 | -0.65715 |
| DAG140_204NH4                 | 0.0012139 | 0.075264 | ↓ | 0.67566 | -0.56563 |
| Glycine_Neg                   | 0.013862  | 0.082637 | ↑ | 1.2549  | 0.32762  |
| CDP-Choline_pos               | 0.014494  | 0.085316 | ↑ | 1.5664  | 0.64749  |
| DAG182_183NH4                 | 0.0015392 | 0.086097 | ↓ | 0.64833 | -0.6252  |
| TAG505_FA140NH4               | 0.0016664 | 0.086097 | ↓ | 0.65342 | -0.61391 |
| NADP_pos.1                    | 0.014991  | 0.087134 | ↑ | 1.7648  | 0.81948  |
| Alpha-D-Glucose_Neg           | 0.015245  | 0.087517 | ↑ | 1.7778  | 0.83009  |
| Spermidine_pos                | 0.016234  | 0.09206  | ↑ | 1.2114  | 0.27662  |
| Glutaric Acid_Neg             | 0.016463  | 0.092231 | ↑ | 1.2948  | 0.37278  |
| Fructose 1,6-Bisphosphate_Neg | 0.017164  | 0.095017 | ↑ | 1.2831  | 0.35963  |
| Glyoxylate_Neg                | 0.018052  | 0.098755 | ↑ | 1.2854  | 0.36227  |
| Tryptophan_pos                | 0.018348  | 0.099205 | ↑ | 1.1268  | 0.17228  |
| FFA182                        | 0.0022041 | 0.10074  | ↓ | 0.68032 | -0.55572 |
| TAG485_FA183NH4               | 0.0022748 | 0.10074  | ↓ | 0.61801 | -0.69429 |
| Indole-2-Carboxylic Acid_Neg  | 0.019661  | 0.10398  | ↑ | 1.2332  | 0.3024   |
| L-Tryptophan_pos              | 0.019679  | 0.10398  | ↑ | 1.1481  | 0.1993   |
| Threitol_Neg                  | 0.021058  | 0.11002  | ↑ | 1.308   | 0.38738  |
| Ureidopropionic Acid_Neg      | 0.021891  | 0.1131   | ↑ | 1.1962  | 0.25844  |
| Citicoline_pos                | 0.022229  | 0.11359  | ↑ | 1.3914  | 0.4765   |
| TAG484_FA204NH4               | 0.0030596 | 0.12591  | ↓ | 0.5911  | -0.75852 |
| DAG161_226NH4                 | 0.0033304 | 0.12591  | ↓ | 0.70781 | -0.49856 |
| TAG505_FA205NH4               | 0.0035726 | 0.12591  | ↓ | 0.71509 | -0.4838  |

|                                   |           |         |           |          |
|-----------------------------------|-----------|---------|-----------|----------|
| TAG504_FA203NH4                   | 0.0036555 | 0.12591 | ↓ 0.65093 | -0.61943 |
| Valine_pos                        | 0.025542  | 0.1278  | ↑ 1.1708  | 0.22753  |
| Cis-Aconitate_Neg                 | 0.025908  | 0.1278  | ↑ 2.1012  | 1.0712   |
| Itaconic Acid_Neg                 | 0.026027  | 0.1278  | ↑ 1.2139  | 0.27966  |
| Oxaloacetate_Neg                  | 0.026215  | 0.1278  | ↑ 1.1784  | 0.23681  |
| Ethylmalonic Acid_Neg             | 0.026386  | 0.1278  | ↑ 1.3061  | 0.38521  |
| N-Acetylmethionine_pos            | 0.027704  | 0.13281 | ↓ 0.70053 | -0.51349 |
| Guanosine Monophosphate_pos       | 0.029685  | 0.14085 | ↓ 0.73014 | -0.45375 |
| Asparagine_pos                    | 0.030255  | 0.1417  | ↑ 1.3099  | 0.38941  |
| 2-Ketohexanoic Acid_Neg           | 0.030473  | 0.1417  | ↑ 1.2656  | 0.33987  |
| TAG484_FA140NH4                   | 0.0045011 | 0.14311 | ↓ 0.69383 | -0.52734 |
| LPC182AcO                         | 0.0046165 | 0.14311 | ↓ 0.5543  | -0.85126 |
| 2-Aminopimelic Acid_Neg           | 0.031954  | 0.14679 | ↑ 1.2974  | 0.37567  |
| 2,3-Diphospho-D-Glyceric Acid_Neg | 0.0322    | 0.14679 | ↑ 2.1822  | 1.1258   |
| Indole-3-Acetic Acid_Neg          | 0.032606  | 0.1472  | ↑ 1.3314  | 0.413    |
| Alloisoleucine_pos                | 0.033331  | 0.14903 | ↑ 1.2242  | 0.29184  |
| Glutathione Reduced_Neg           | 0.033984  | 0.1505  | ↑ 1.2412  | 0.31173  |
| TAG569_FA204NH4                   | 0.0051428 | 0.15183 | ↓ 0.47586 | -1.0714  |
| NAD_pos_1                         | 0.035146  | 0.15409 | ↑ 1.2737  | 0.34903  |
| Octanoylcarnitine_pos             | 0.035695  | 0.15409 | ↑ 2.3385  | 1.2256   |
| N-Glycyl-L-Proline_pos            | 0.035822  | 0.15409 | ↓ 0.30832 | -1.6975  |
| Pantothenate_pos                  | 0.036121  | 0.15409 | ↑ 1.2958  | 0.37385  |
| 2-Hydroxybutyrate_Neg             | 0.037571  | 0.15882 | ↑ 1.18    | 0.23873  |
| Inositol_Neg                      | 0.038009  | 0.15923 | ↑ 1.2835  | 0.36006  |
| CE240H                            | 0.0056943 | 0.16048 | ↑ 1.6878  | 0.75511  |
| TAG484_FA182NH4                   | 0.0062159 | 0.16316 | ↓ 0.66809 | -0.58188 |
| PS170_182-H                       | 0.0065178 | 0.16316 | ↑ 1.5423  | 0.62508  |
| TAG510_FA170NH4                   | 0.0067264 | 0.16316 | ↓ 0.72595 | -0.46205 |
| PS201_202-H                       | 0.0068424 | 0.16316 | ↓ 0.5859  | -0.77126 |
| Xanthine_Neg                      | 0.039609  | 0.16445 | ↑ 1.1528  | 0.20509  |
| Phosphoglycerates_Neg             | 0.041386  | 0.17031 | ↓ 0.80855 | -0.30659 |
| Xanthylic Acid_Neg                | 0.042485  | 0.17157 | ↓ 0.70348 | -0.50743 |
| O-Acetylserine_pos                | 0.042706  | 0.17157 | ↑ 1.2456  | 0.31689  |
| Serine_pos                        | 0.042801  | 0.17157 | ↓ 0.5452  | -0.87514 |
| ADP-Ribose_pos                    | 0.043533  | 0.17301 | ↓ 0.53615 | -0.89929 |
| Indole_pos                        | 0.044076  | 0.17306 | ↑ 1.1352  | 0.18293  |
| Sorbitol_Neg                      | 0.044289  | 0.17306 | ↑ 1.2617  | 0.33542  |

|                                  |           |         |           |          |
|----------------------------------|-----------|---------|-----------|----------|
| DAG140_182NH4                    | 0.0078325 | 0.17973 | ↓ 0.78856 | -0.34271 |
| TAG524_FA224NH4                  | 0.008117  | 0.17973 | ↓ 0.50315 | -0.99094 |
| Thiamine Pyrophosphate_Neg       | 0.048188  | 0.18552 | ↑ 1.2941  | 0.37191  |
| dCTP_Neg                         | 0.048638  | 0.18552 | ↑ 2.2545  | 1.1728   |
| 2-Deoxyguanosine 5-Monophosphate | 0.048674  | 0.18552 | ↑ 1.1422  | 0.19186  |
| TAG505_FA161NH4                  | 0.0087257 | 0.18655 | ↓ 0.73525 | -0.4437  |
| 3-Indolepropionate_pos           | 0.049887  | 0.18723 | ↑ 1.1657  | 0.22122  |
| Xanthine/Oxypurinol_Neg          | 0.049927  | 0.18723 | ↑ 1.1698  | 0.22623  |
| TAG485_FA182NH4                  | 0.0091734 | 0.18911 | ↓ 0.61407 | -0.70353 |
| TAG503_FA140NH4                  | 0.0094554 | 0.18911 | ↓ 0.7532  | -0.4089  |
| TAG548_FA182NH4                  | 0.010025  | 0.19072 | ↓ 0.72307 | -0.46779 |
| TAG505_FA182NH4                  | 0.010151  | 0.19072 | ↓ 0.65053 | -0.62032 |
| DAG182_224NH4                    | 0.011277  | 0.20564 | ↓ 0.62274 | -0.6833  |
| TAG484_FA161NH4                  | 0.01248   | 0.22108 | ↓ 0.79095 | -0.33833 |
| PS160_226-H                      | 0.013603  | 0.23427 | ↑ 1.398   | 0.48339  |
| TAG463_FA182NH4                  | 0.015398  | 0.24508 | ↓ 0.70399 | -0.50637 |
| CL 721_281.2                     | 0.015452  | 0.24508 | ↑ 1.6729  | 0.74238  |
| TAG524_FA203NH4                  | 0.015712  | 0.24508 | ↓ 0.65788 | -0.60411 |
| TAG504_FA140NH4                  | 0.016288  | 0.24508 | ↓ 0.69479 | -0.52534 |
| DAG160_183NH4                    | 0.016291  | 0.24508 | ↓ 0.84177 | -0.24849 |
| TAG463_FA183NH4                  | 0.016776  | 0.24508 | ↓ 0.74014 | -0.43413 |
| TAG492_FA160NH4                  | 0.016998  | 0.24508 | ↑ 1.2207  | 0.28775  |
| TAG480_FA180NH4                  | 0.018104  | 0.25293 | ↓ 0.78718 | -0.34524 |
| TAG504_FA204NH4                  | 0.018358  | 0.25293 | ↓ 0.66371 | -0.59138 |
| TAG545_FA224NH4                  | 0.0209    | 0.28123 | ↓ 0.50686 | -0.98033 |
| DAG182_203NH4                    | 0.022505  | 0.28123 | ↓ 0.66078 | -0.59776 |
| TAG484_FA181NH4                  | 0.022553  | 0.28123 | ↓ 0.79523 | -0.33056 |
| PS150_224-H                      | 0.0229    | 0.28123 | ↑ 1.5529  | 0.63495  |
| FFA181                           | 0.023691  | 0.28123 | ↓ 0.77597 | -0.36593 |
| PS180_182-H                      | 0.024091  | 0.28123 | ↑ 1.563   | 0.64429  |
| PS161_224-H                      | 0.02424   | 0.28123 | ↑ 0.73395 | -0.44626 |
| TAG525_FA203NH4                  | 0.024314  | 0.28123 | ↓ 0.64841 | -0.62503 |
| TAG470_FA140NH4                  | 0.024494  | 0.28123 | ↓ 0.78418 | -0.35075 |
| TAG502_FA202NH4                  | 0.02674   | 0.29186 | ↓ 0.71189 | -0.49028 |
| TAG526_FA161NH4                  | 0.027392  | 0.29186 | ↓ 0.68367 | -0.54864 |
| TAG510_FA180NH4                  | 0.027746  | 0.29186 | ↓ 0.79067 | -0.33885 |
| TAG500_FA180NH4                  | 0.027981  | 0.29186 | ↓ 0.73046 | -0.45313 |

|                 |          |         |           |          |
|-----------------|----------|---------|-----------|----------|
| CL 726_283.2    | 0.028061 | 0.29186 | ↓ 0.2794  | -1.8396  |
| TAG523_FA140NH4 | 0.028245 | 0.29186 | ↓ 0.64366 | -0.63564 |
| TAG503_FA203NH4 | 0.029282 | 0.29762 | ↓ 0.68714 | -0.54133 |
| TAG524_FA202NH4 | 0.0306   | 0.3027  | ↓ 0.69629 | -0.52224 |
| TAG490_FA160NH4 | 0.030759 | 0.3027  | ↓ 0.83497 | -0.2602  |
| PS170_204-H     | 0.03195  | 0.30951 | ↑ 1.5079  | 0.59253  |
| TAG461_FA180NH4 | 0.032819 | 0.31028 | ↓ 0.82886 | -0.2708  |
| TAG470_FA160NH4 | 0.03358  | 0.31028 | ↓ 0.81859 | -0.28879 |
| TAG504_FA161NH4 | 0.033748 | 0.31028 | ↓ 0.82024 | -0.28588 |
| TAG442_FA182NH4 | 0.034031 | 0.31028 | ↓ 0.67009 | -0.57758 |
| TAG525_FA204NH4 | 0.034566 | 0.31028 | ↓ 0.66501 | -0.58856 |
| TAG462_FA182NH4 | 0.035032 | 0.31028 | ↓ 0.7376  | -0.43909 |
| TAG440_FA160NH4 | 0.036312 | 0.31709 | ↓ 0.844   | -0.24469 |
| TAG461_FA161NH4 | 0.036844 | 0.31727 | ↓ 0.89001 | -0.16811 |
| TAG525_FA182NH4 | 0.037571 | 0.31909 | ↓ 0.69675 | -0.52129 |
| TAG567_FA224NH4 | 0.038286 | 0.32078 | ↓ 0.42821 | -1.2236  |
| CE224H          | 0.039696 | 0.32815 | ↓ 1.3706  | 0.45479  |
| TAG505_FA160NH4 | 0.041545 | 0.33347 | ↑ 0.78422 | -0.35066 |
| TAG463_FA140NH4 | 0.041779 | 0.33347 | ↓ 0.70811 | -0.49796 |
| TAG460_FA180NH4 | 0.042309 | 0.33347 | ↓ 0.82208 | -0.28266 |
| PS161_180-H     | 0.042763 | 0.33347 | ↓ 2.2399  | 1.1635   |
| TAG526_FA205NH4 | 0.043029 | 0.33347 | ↑ 0.81384 | -0.29718 |
| TAG526_FA204NH4 | 0.044527 | 0.34082 | ↓ 0.64304 | -0.63701 |
| TAG440_FA140NH4 | 0.046872 | 0.35065 | ↓ 0.83605 | -0.25834 |
| TAG504_FA182NH4 | 0.046942 | 0.35065 | ↓ 0.83262 | -0.26427 |
| TAG526_FA183NH4 | 0.047859 | 0.35324 | ↓ 0.69882 | -0.517   |
| TAG460_FA140NH4 | 0.049022 | 0.35732 | ↓ 0.82279 | -0.28141 |
|                 |          |         | ↓         |          |

**Table S5.** Q1/Q3 transitions for metabolites quantified using multiple reaction monitoring mass spectrometry (MRM-MS).

| Metabolites                | Parent ion (m/z)<br>Q1 | Daughter ion (m/z)<br>Q3 | Cone voltage(V) | Collision energy<br>(V) | Ionization mode |
|----------------------------|------------------------|--------------------------|-----------------|-------------------------|-----------------|
| All trans RA-d5            | 306.2800               | 162.1654                 | 28              | 22                      | positive        |
|                            |                        | 205.0300                 | 66              | 14                      | positive        |
|                            |                        | 201.2012                 | 60              | 16                      | positive        |
| Retinoic acid              | 301.3685               | 123.0716                 | 60              | 16                      | positive        |
| Adenosine-2-d <sup>1</sup> | 268.8800               | 137.12                   | 86              | 6                       | positive        |
| Acetyl CoA                 | 810.2853               | 91.1313                  | 30              | 40                      | positive        |

**Table S6.** The CT values for EMT-array gene expression in PANC-1 cells after treatment with 9-cis-RA and TGF $\beta$  treatment.

| well# | Gene     | control   | control   | TGF $\beta$ | TGF $\beta$ | 9-cis RA  | 9-cis RA  |
|-------|----------|-----------|-----------|-------------|-------------|-----------|-----------|
| A01   | AHNAK    | 23.72213  | 24.001171 | 25.373894   | 25.212965   | 23.900797 | 22.97089  |
| A02   | AKT1     | 24.716043 | 24.865946 | 25.470478   | 25.137167   | 24.909576 | 24.970018 |
| A03   | BMP1     | 27.309622 | 27.448784 | 27.274576   | 27.26457    | 27.48462  | 27.683554 |
| A04   | BMP2     | 32.46994  | 32.79787  | 32.643734   | 33.095387   | 32.451546 | 32.064922 |
| A05   | BMP7     | 30.487295 | 30.804655 | 31.95954    | 32.190575   | 31.377134 | 30.240705 |
| A06   | CALD1    | 26.156288 | 26.004108 | 25.705177   | 25.459684   | 26.527279 | 26.89988  |
| A07   | CAMK2N1  | 29.695908 | 29.167866 | 28.991713   | 29.680927   | 28.75873  | 28.88902  |
| A08   | CAV2     | 24.475311 | 24.378048 | 24.718864   | 24.662163   | 23.849594 | 24.304272 |
| A09   | CDH1     | 28.18994  | 27.206379 | 28.398748   | 28.585682   | 27.06908  | 26.30639  |
| A10   | CDH2     | 26.399382 | 26.585398 | 25.660276   | 25.62273    | 26.421291 | 25.925327 |
| A12   | COL3A1   | 30.22915  | 29.984396 | 29.128742   | 28.264496   | 29.757551 | 29.290737 |
| B01   | COL5A2   | 23.94546  | 24.080275 | 22.817299   | 22.944618   | 23.303005 | 23.828856 |
| B02   | CTNNB1   | 27.11158  | 26.886679 | 27.330053   | 26.872774   | 27.53634  | 26.638065 |
| B03   | DSC2     | 27.969933 | 27.90065  | 28.123047   | 28.117176   | 28.109028 | 27.456753 |
| B04   | DSP      | 26.635202 | 26.311153 | 26.4048     | 26.362173   | 26.357178 | 25.576382 |
| B05   | EGFR     | 23.309435 | 23.432787 | 23.955069   | 23.88893    | 23.176468 | 22.775122 |
| B06   | ERBB3    | 29.75765  | 30.072342 | 29.4883     | 29.32204    | 30.223972 | 29.83775  |
| B07   | ESR1     | 35.38256  | 35.266315 | 35.977093   | 36.593674   | 36.44503  | 35.39192  |
| B08   | F11R     | 25.162985 | 25.2715   | 25.454098   | 25.271702   | 25.363554 | 24.66876  |
| B10   | FN1      | 27.802143 | 27.636286 | 26.521307   | 26.250874   | 26.791447 | 26.098782 |
| B11   | FOXC2    | 27.471842 | 27.410688 | 27.45844    | 27.386799   | 27.61804  | 27.878096 |
| B12   | FZD7     | 28.010073 | 28.157347 | 28.229391   | 28.315681   | 27.858418 | 27.62633  |
| C01   | GNG11    | 30.144403 | 29.551682 | 30.435877   | 30.468008   | 29.399435 | 29.51467  |
| C02   | GSC      | 32.784836 | 32.825596 | 33.229156   | 32.82066    | 33.369858 | 32.293137 |
| C03   | GSK3B    | 26.468384 | 26.38953  | 26.322752   | 26.669819   | 26.124872 | 26.069475 |
| C04   | IGFBP4   | 26.428608 | 26.182045 | 26.723322   | 26.765253   | 26.571337 | 26.404688 |
| C06   | ILK      | 23.178232 | 23.165524 | 23.590351   | 23.301498   | 23.210276 | 23.3959   |
| C07   | ITGA5    | 24.90651  | 24.896955 | 24.507765   | 24.448751   | 24.163416 | 24.544832 |
| C08   | ITGAV    | 22.57352  | 22.566622 | 22.41121    | 21.903906   | 23.335123 | 22.81176  |
| C09   | ITGB1    | 22.089487 | 21.71333  | 21.848166   | 21.554403   | 21.333174 | 21.17167  |
| C10   | JAG1     | 24.949516 | 24.824884 | 23.216496   | 23.239279   | 24.621735 | 24.64482  |
| C11   | KRT14    | 32.846924 | 33.331963 | 38.011307   | 35.799213   | 30.87995  | 34.20887  |
| C12   | KRT19    | 23.91453  | 24.384045 | 26.00303    | 25.622774   | 21.863655 | 23.096504 |
| D01   | KRT7     | 32.959957 | 32.179035 | 32.598465   | 31.805792   | 31.840647 | 34.838634 |
| D02   | MAP1B    | 24.308073 | 24.283142 | 23.487259   | 23.467625   | 24.149122 | 23.396605 |
| D03   | MMP2     | 23.722553 | 23.669231 | 22.631474   | 22.716732   | 23.386957 | 23.008833 |
| D05   | MMP9     | 30.321085 | 30.172823 | 30.60738    | 30.709908   | 30.326618 | 30.858786 |
| D06   | MSN      | 23.823055 | 23.717724 | 23.746714   | 23.696815   | 24.27202  | 23.654661 |
| D07   | MST1R    | 25.66755  | 25.797096 | 27.308674   | 26.754816   | 26.135452 | 26.570486 |
| D08   | NODAL    | 30.184517 | 29.925932 | 30.650589   | 30.94477    | 30.743912 | 30.16004  |
| D09   | NOTCH1   | 29.133568 | 29.251791 | 28.579674   | 28.988064   | 29.39544  | 28.812618 |
| D10   | NUDT13   | 25.754204 | 25.52295  | 25.743847   | 25.671064   | 25.474466 | 26.212975 |
| D11   | OCLN     | 25.10093  | 24.91363  | 24.976164   | 25.293768   | 24.442993 | 24.282402 |
| D12   | PDGFRB   | 33.789474 | 33.715214 | 30.956247   | 30.67355    | 34.192135 | 34.86569  |
| E01   | PLEK2    | 29.314657 | 29.123709 | 27.348488   | 27.547367   | 28.716623 | 29.763626 |
| E02   | DES1     | 25.322342 | 25.49086  | 25.41833    | 25.280693   | 24.865448 | 25.15678  |
| E03   | PTK2     | 24.552269 | 24.305845 | 24.347153   | 24.549002   | 23.99211  | 24.598883 |
| E04   | PTP4A1   | 24.971855 | 24.707754 | 24.316957   | 24.328968   | 24.836185 | 24.757366 |
| E05   | RAC1     | 22.771023 | 22.571993 | 22.91725    | 22.822977   | 22.48092  | 22.745274 |
| E06   | RGS2     | 28.59829  | 28.598232 | 28.889122   | 29.477032   | 27.578999 | 29.208578 |
| E07   | SERPINE1 | 21.273634 | 21.221365 | 18.940994   | 19.192759   | 20.664064 | 20.552711 |
| E08   | GEMIN2   | 27.330616 | 26.857687 | 26.417065   | 26.556849   | 26.587574 | 27.403286 |
| E09   | SMAD2    | 24.984016 | 24.861345 | 25.254725   | 25.188396   | 24.939096 | 24.681183 |
| E10   | SNAI1    | 31.754438 | 31.54407  | 29.888979   | 29.862576   | 32.309776 | 32.317303 |

|     |          |           |           |           |           |           |           |
|-----|----------|-----------|-----------|-----------|-----------|-----------|-----------|
| E12 | SNAI3    | 27.613657 | 27.798435 | 28.586746 | 28.146723 | 27.995163 | 27.757162 |
| F02 | SPARC    | 26.958439 | 27.009361 | 27.700678 | 27.5204   | 25.232622 | 24.786722 |
| F04 | STAT3    | 22.963017 | 23.128721 | 23.868423 | 23.802593 | 22.776419 | 22.542494 |
| F05 | STEAP1   | 26.230211 | 26.29684  | 26.421646 | 26.039219 | 25.36733  | 26.79008  |
| F06 | TCF3     | 25.463226 | 25.471003 | 25.473618 | 25.62543  | 25.030828 | 25.859816 |
| F07 | TCF4     | 28.578587 | 28.450489 | 27.946072 | 28.774704 | 27.939846 | 28.130228 |
| F08 | TFPI2    | 30.927755 | 30.99183  | 31.330347 | 28.504354 | 29.178204 | 29.134922 |
| F10 | TGFB2    | 24.315224 | 24.106289 | 24.314777 | 24.126863 | 23.533129 | 23.864262 |
| F11 | TGFB3    | 27.665234 | 27.822187 | 28.630426 | 28.210752 | 27.76456  | 27.667475 |
| F12 | TIMP1    | 25.940151 | 27.77124  | 27.915367 | 27.92035  | 27.651844 | 28.528038 |
| G02 | TMEM132A | 24.903408 | 24.888134 | 25.667484 | 24.674028 | 24.576675 | 24.406626 |
| G03 | TSPAN13  | 24.099522 | 24.378971 | 25.367882 | 25.408718 | 24.450918 | 24.786058 |
| G05 | VCAN     | 29.660183 | 30.876116 | 29.277136 | 28.870779 | 30.641521 | 30.269152 |
| G06 | VIM      | 19.961771 | 19.880146 | 19.437693 | 19.340944 | 19.701712 | 19.684406 |
| G07 | VPS13A   | 24.111542 | 23.843824 | 24.310503 | 24.322866 | 23.547522 | 24.287523 |
| G08 | WNT11    | 26.171305 | 31.721075 | 31.853115 | 29.451378 | 33.64326  | 32.003315 |
| G09 | WNT5A    | 27.981655 | 30.150057 | 29.009012 | 29.492409 | 29.698029 | 30.832056 |
| G10 | WNT5B    | 26.28062  | 26.589397 | 26.613243 | 26.726038 | 26.43868  | 26.52162  |
| G11 | ZEB1     | 26.96873  | 26.792606 | 26.948341 | 26.692385 | 26.871046 | 26.971975 |
| H01 | ACTB     | 20.027222 | 20.180428 | 19.69842  | 20.032513 | 19.837532 | 19.780613 |
| H02 | B2M      | 22.753914 | 22.714182 | 22.981619 | 23.010551 | 21.68105  | 22.600576 |
| H03 | GAPDH    | 22.21239  | 22.141045 | 22.474829 | 22.35109  | 21.570358 | 21.267801 |
| H04 | HPRT1    | 26.512363 | 26.49413  | 26.182943 | 26.419352 | 26.358446 | 26.475296 |
| H05 | RPLP0    | 20.239859 | 20.205614 | 20.27759  | 20.128023 | 19.63809  | 19.450907 |
| H07 | RTC      | 22.093557 | 21.981878 | 21.500277 | 22.48454  | 21.739742 | 22.264055 |
| H08 | RTC      | 21.776161 | 21.874844 | 21.597733 | 22.374355 | 21.659988 | 22.069073 |
| H09 | RTC      | 21.97254  | 21.913893 | 21.440775 | 22.838408 | 21.829437 | 22.302492 |
| H10 | PPC      | 19.202522 | 20.501808 | 20.339687 | 20.055498 | 19.883312 | 20.304695 |

**Table S7.** Demographic details of the study participants.

|                    | Normal (n= 9) | Pancreatitis (n=10) | IPMN (n=9) | PDAC (n=11) |
|--------------------|---------------|---------------------|------------|-------------|
| Median age (years) | 80.4          | 57.2                | 53.7       | 60.9        |
| Ethnicity          |               |                     |            |             |
| Caucasian          | 9             | 6                   | 7          | 9           |
| African American   | 0             | 2                   | 1          | 2           |
| Asian              | 0             | 1                   | 0          | 0           |
| Hispanic           | 0             | 0                   | 1          | 0           |
| Other              | 0             | 1                   | 0          | 0           |
| Gender             |               |                     |            |             |
| Male               | 6             | 7                   | 1          | 6           |
| Female             | 3             | 3                   | 8          | 5           |
| Type II Diabetes   | 2             | 3                   | 2          | 1           |
| Mean BMI           | 26.6          | 25.6                | 30.2       | 29.1        |
| Alcohol (YES)      | 9             | 3                   | 4          | 5           |
| Smoking (YES)      | 0             | 4                   | 6          | 4           |
| Jaundice (YES)     | 0             | 0                   | 3          | 4           |

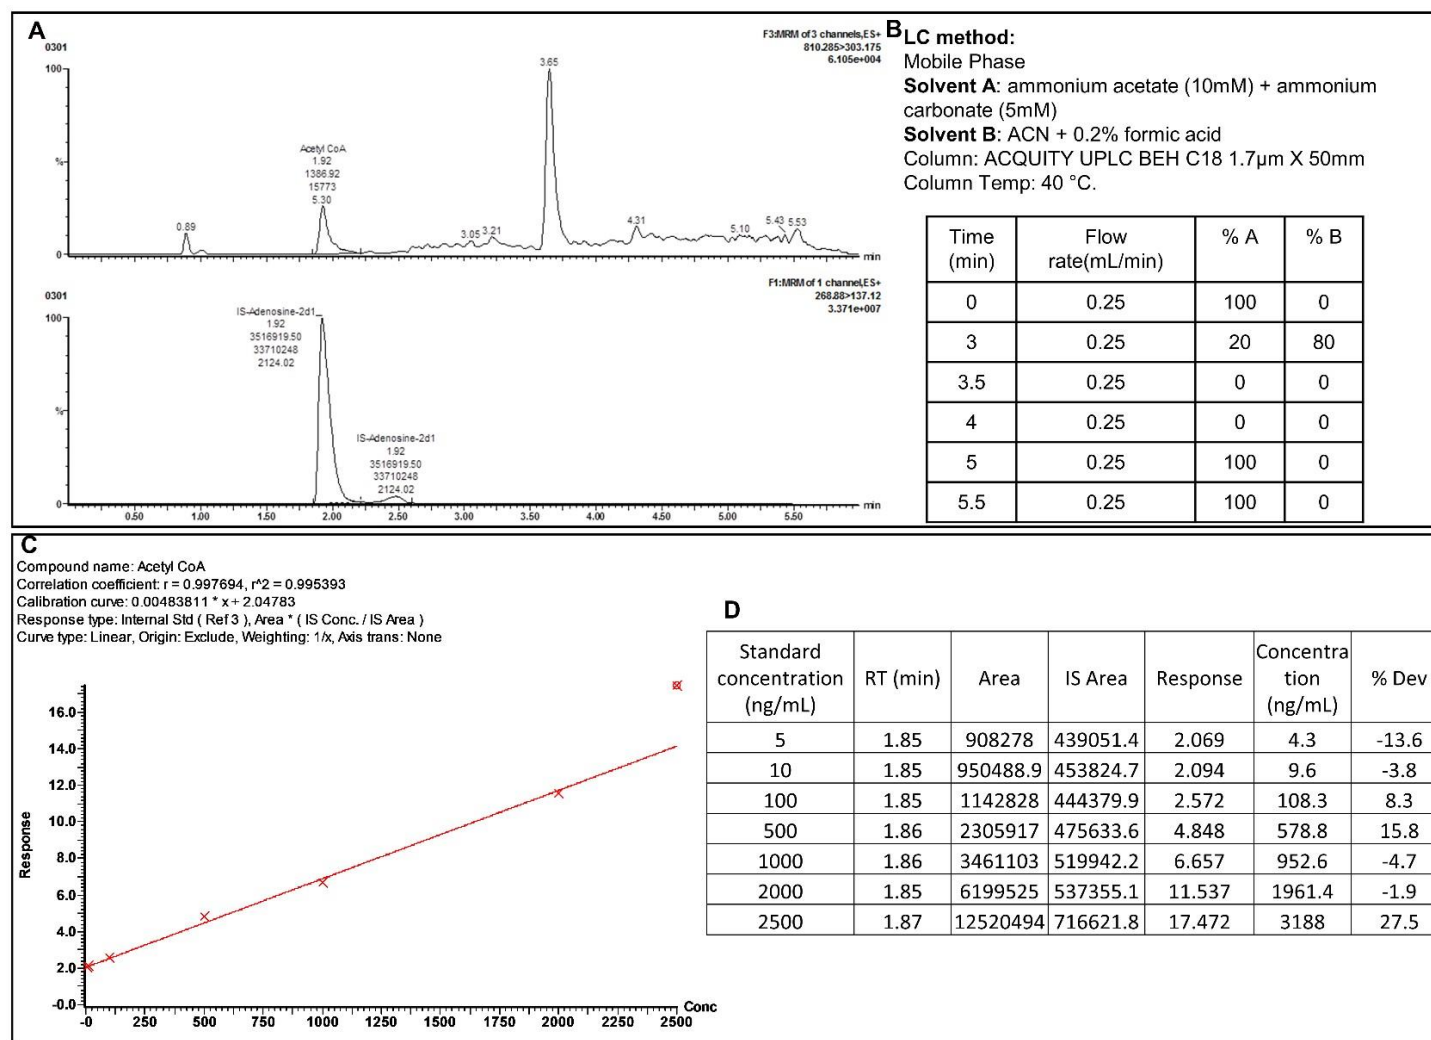

**Figure S1.** MRM MS analysis of acetyl CoA in human plasma. Panel(A). Representative chromatogram for acetyl CoA and the internal standard adenosine-2- D1. Panel (B). LC gradient used for acetyl CoA detection. Panels (C, D). A six point standard calibration curve for acetyl CoA

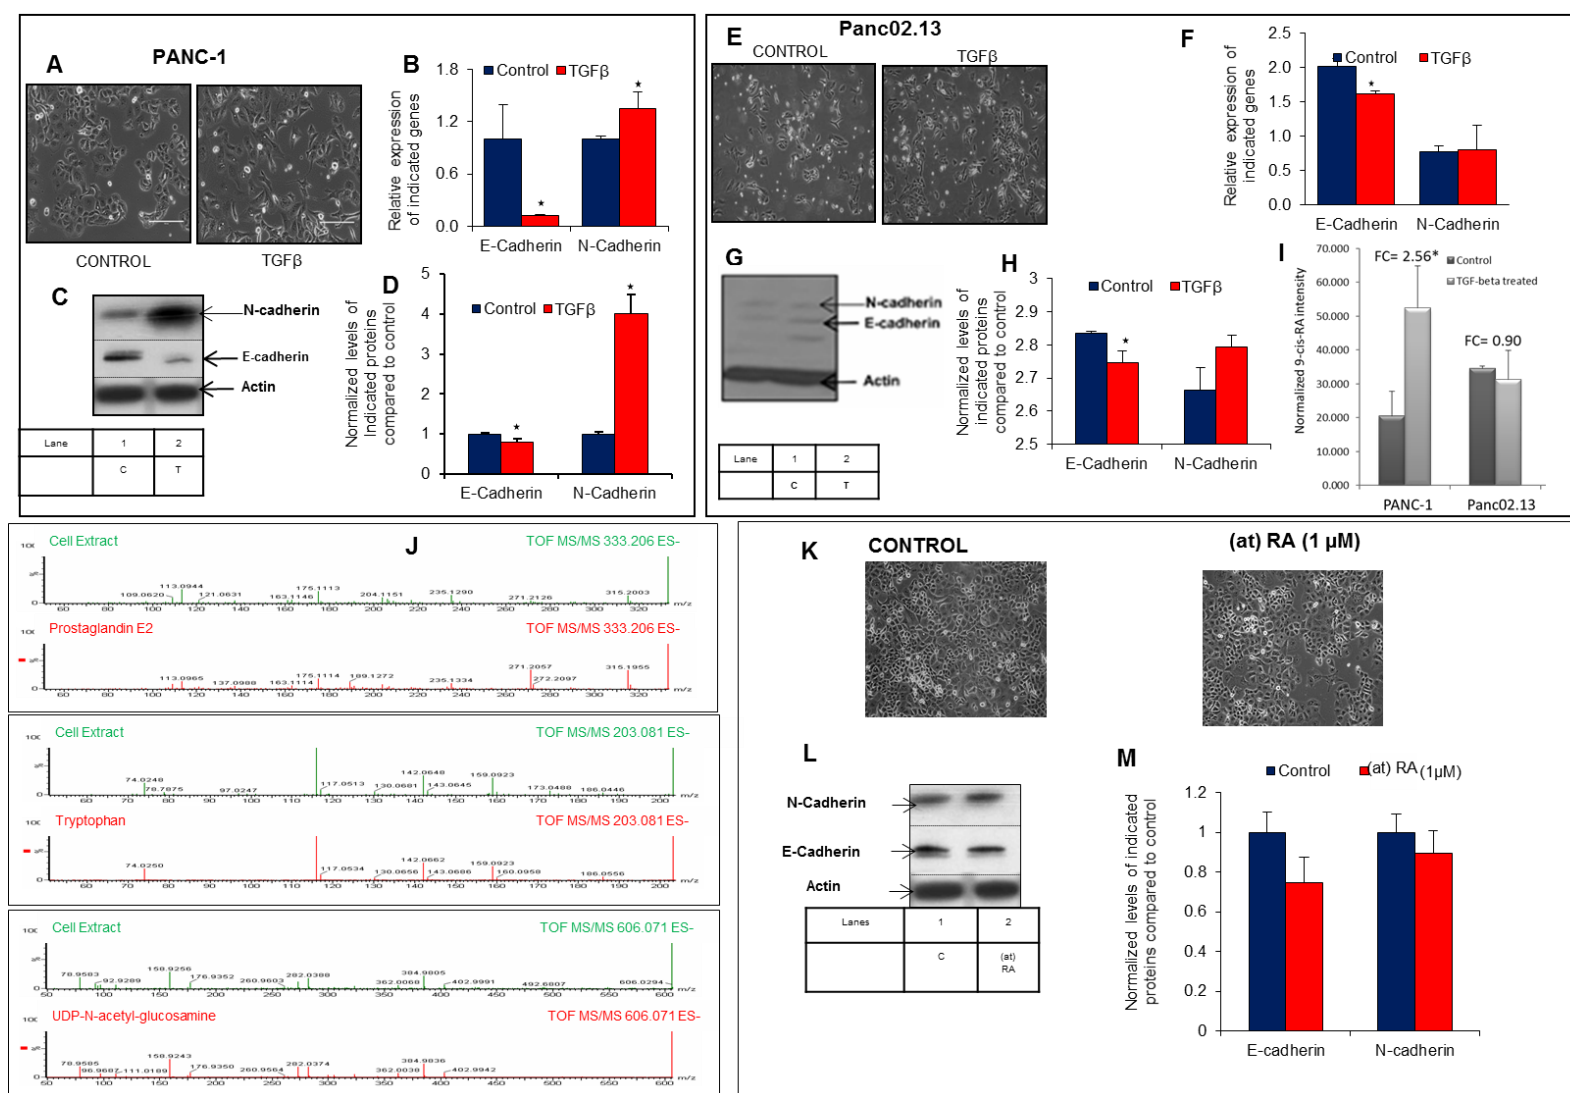

**Figure S2.** TGFβ treatment induced morphological changes in PANC-1 cells along with significant changes in the EMT markers (Panels A-D). Panel (A). Phase contrast images of PANC-1 cells treated with 10 ng/mL of TGFβ (right) and control cells (left). Panel (B). Bar graph showing significant down regulation in E-cadherin and concomitant upregulation in N-cadherin. Panels (C, D). Western blot analysis of altered levels of E-cadherin and N-cadherin in PANC-1 cells treated with 10 ng/mL of TGFβ (T) compared to control cells (C). TGFβ treatment did not induce EMT associated changes in Panc02.13 cells (Panels E-H). Panel E. Phase contrast images of Panc02.13 cells treated with 10ng/mL of TGFβ (right) and control cells (left). Panel F. Bar graph showing statistically insignificant decrease in E-cadherin levels in Panc02.13 cells after TGFβ treatment. Panels G and H. Western blot analysis of E-cadherin and N-

cadherin in Panc02.13 cells treated with 10 ng/mL of TGF $\beta$  (right) and control cells (left). Panel I. Determination of endogenous levels of 9-cis-RA in PANC-1 and Panc02.13 by UPLC-MRM-MS. Panel J. MS/MS validations of a subset of metabolites that were found to be significantly dysregulated in PANC-1 cells upon TGF $\beta$  treatment. Phase contrast (Panel K) and western blot (Panels L and M) showing no change in morphology and EMT marker proteins upon (at) RA treatment.

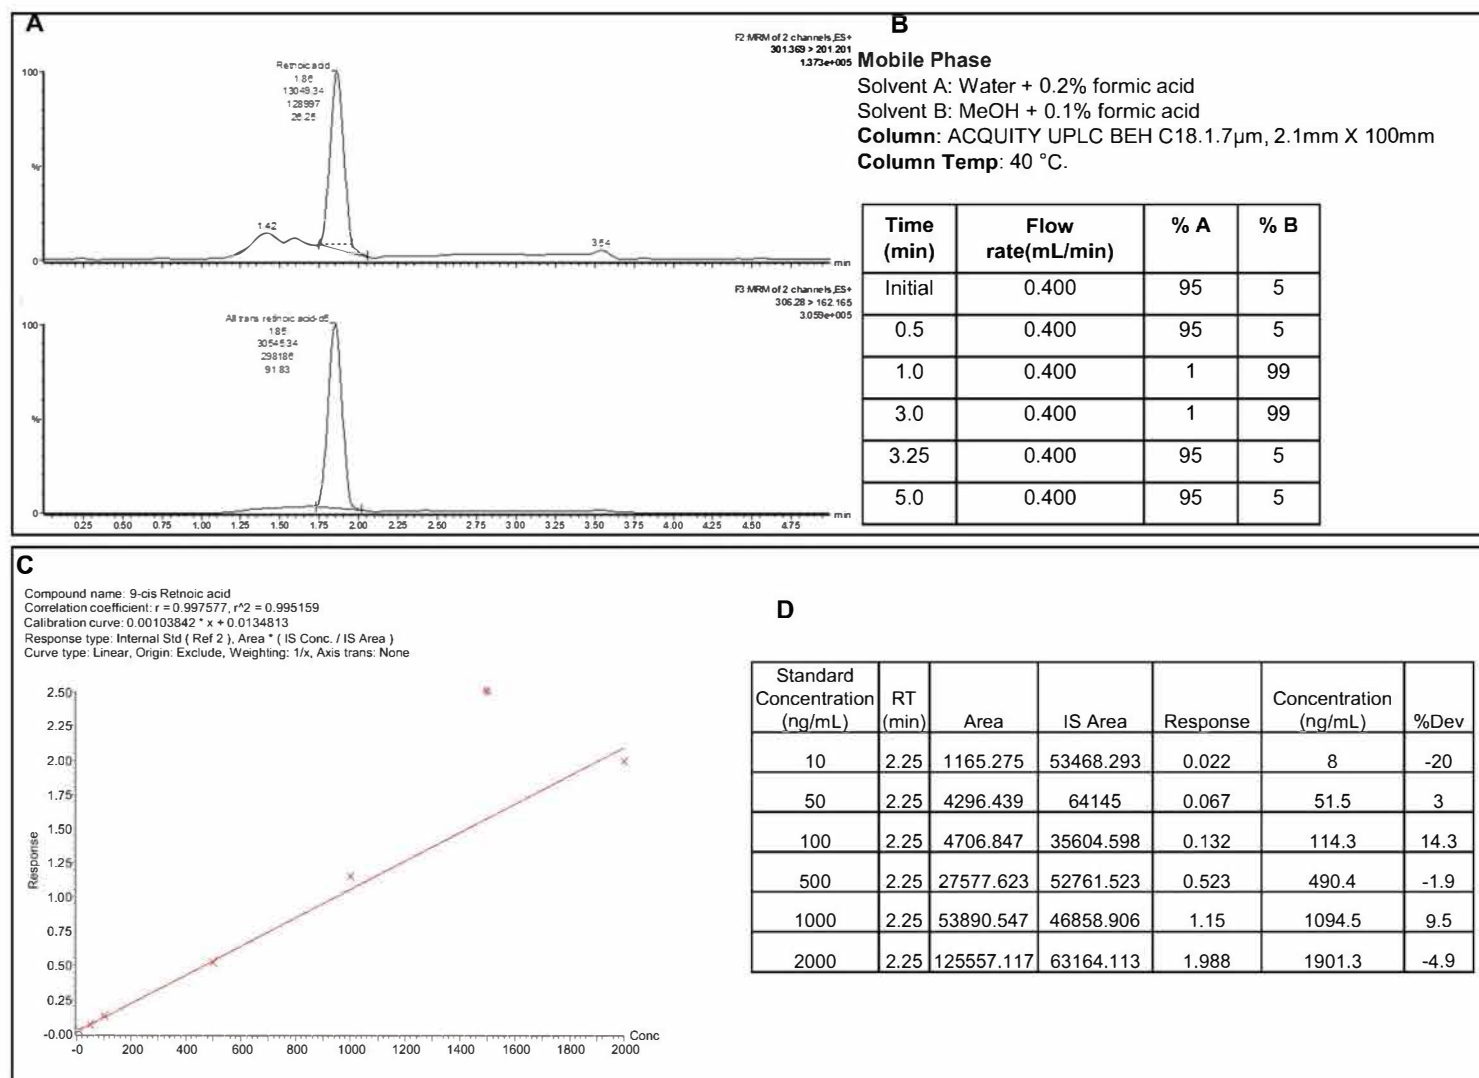

**Figure S3.** UPLC-MRM MS analysis of 9-cis retinoic acid in PANC-1 cells upon treatment with TGF $\beta$ . Panel A. A representative chromatogram showing 9-cis RA peak. Panel B-C. Description of LC-method used for resolution and detection of 9-cis RA. Panel D. A six point standard calibration curve for 9-cis RA.

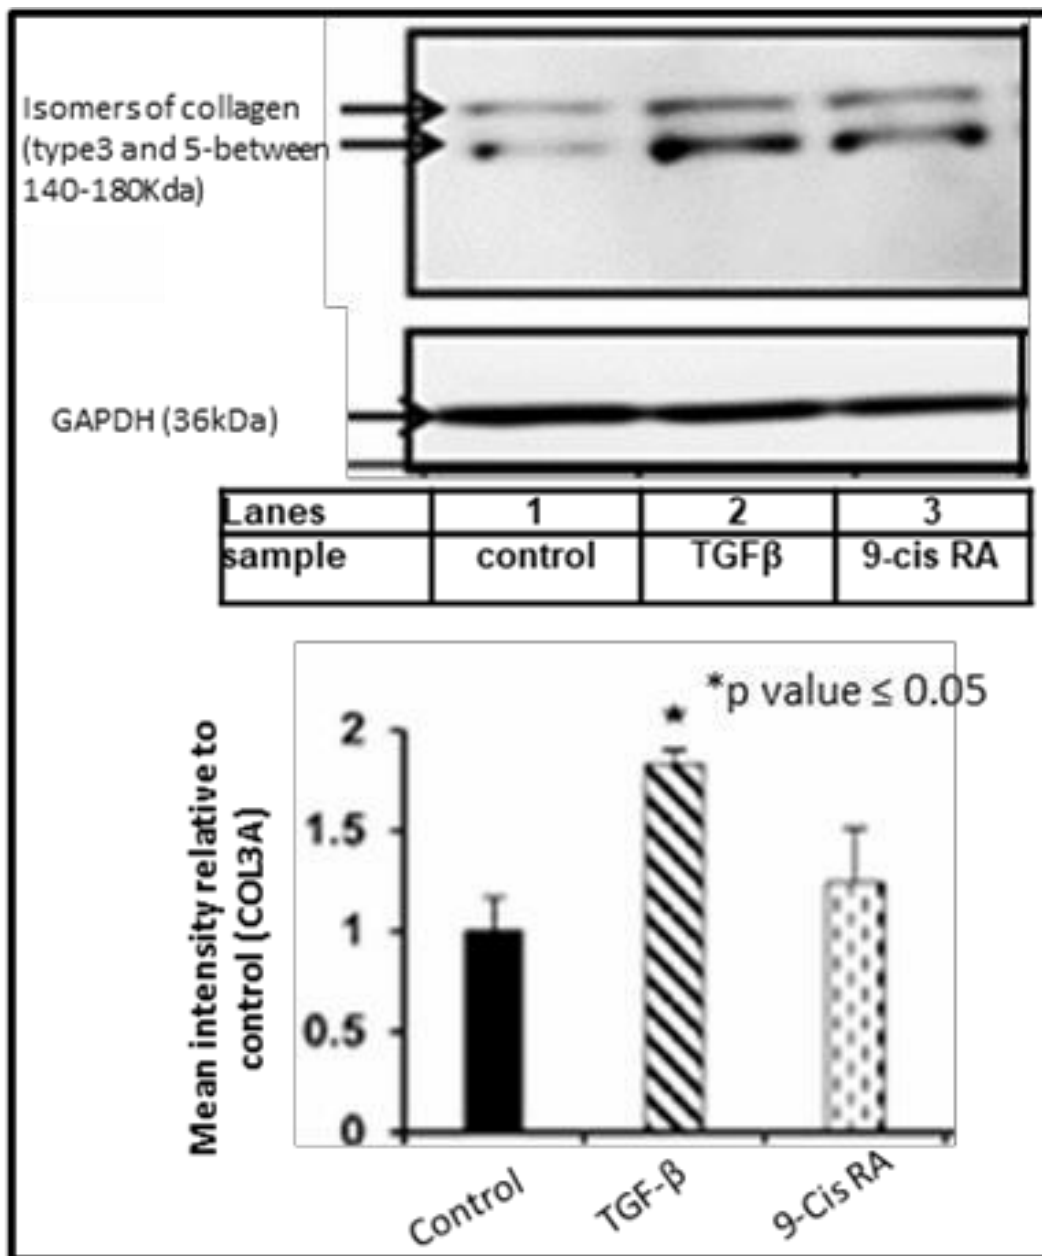

**Figure S4.** Altered intracellular levels of collagen upon TGFβ and 9- Cis RA treatment in PANC-1 cells. Western blot analysis of collagen protein levels in PANC-1 cells for the same set of treatments. Quantitative analysis was performed using BioRad Quantity One software. GAPDH was used for normalization. All *p* values were calculated using Student's *t* test. \*, *p* ≤ 0.05.

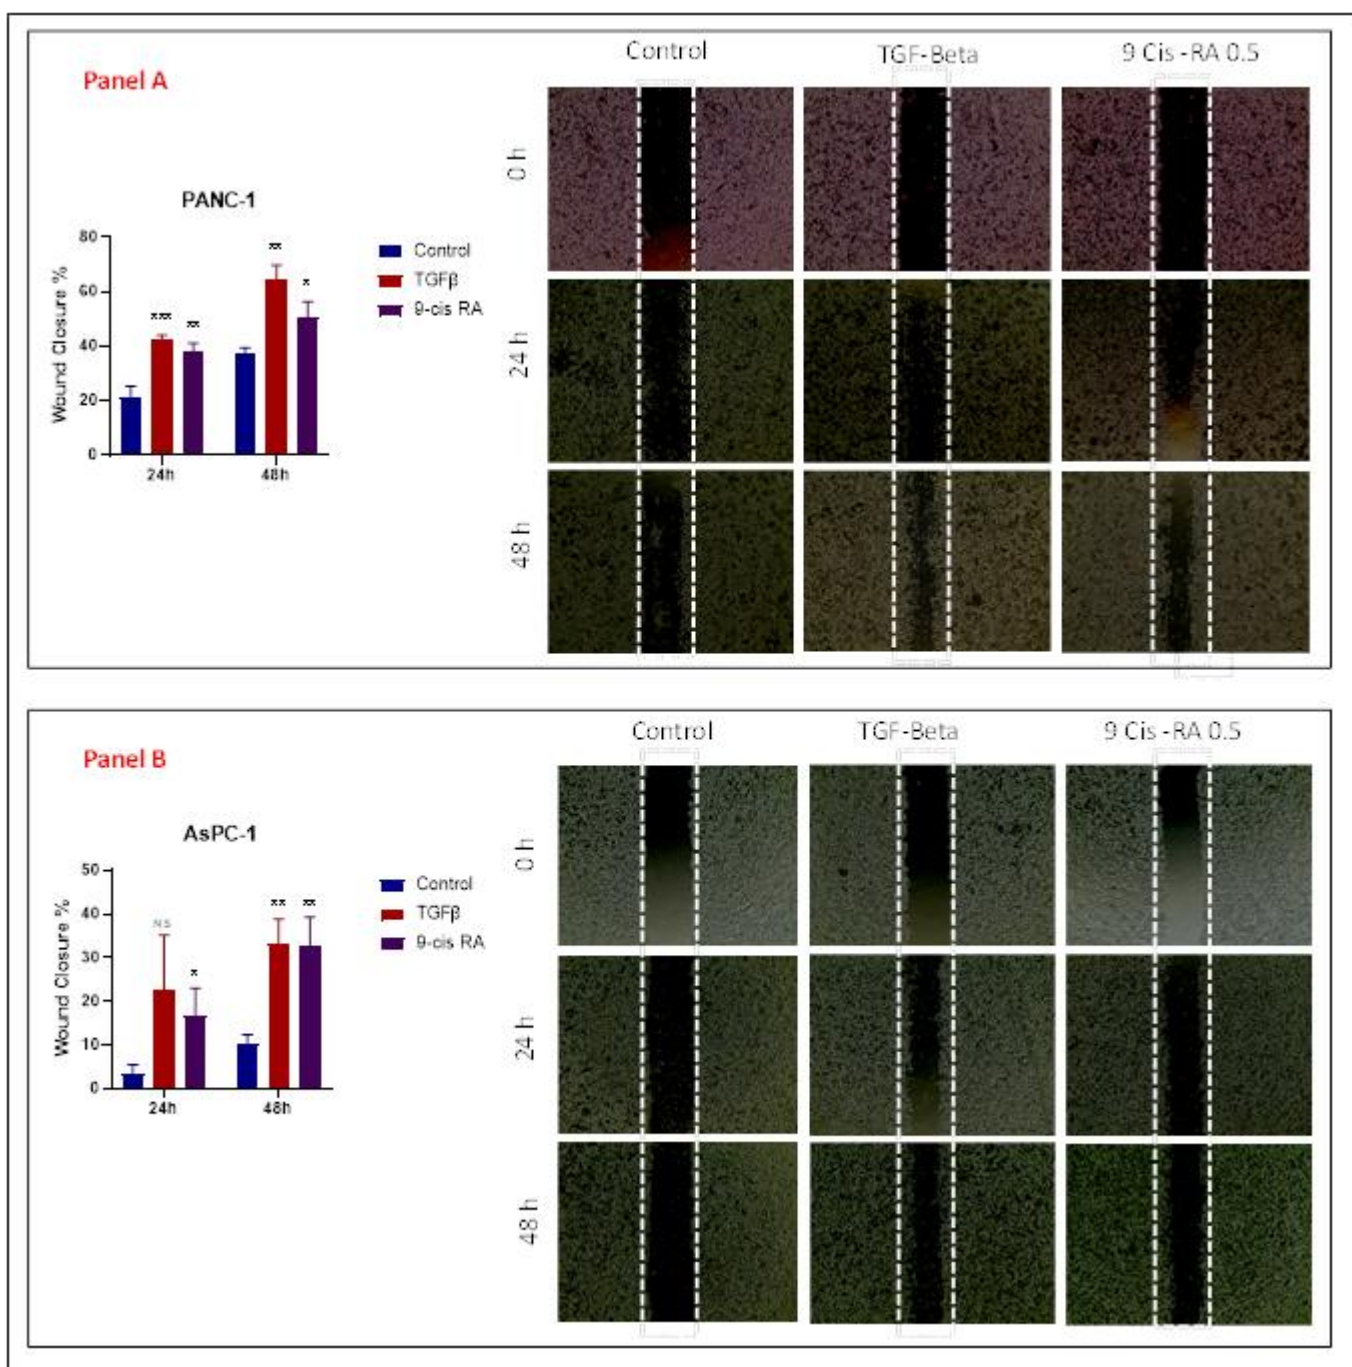

**Figure S5.** In Vitro scratch assay showing the effect of TGFβ and 9-Cis RA treatment on PANC-1 and AsPC-1 cells. Cell migration images of scratch assay at 0, 24 and 48 h and bar graph presenting the wound area closure % based on scratch assay experiment for PANC-1 (Panel A) and AsPC-1 cells (Panel B).

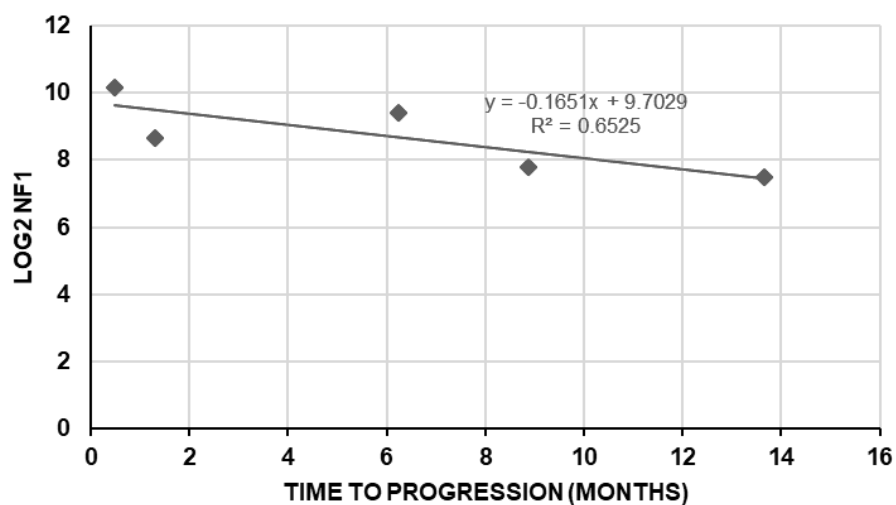

**Figure S6.** Correlation analysis suggesting moderate correlation between FN1 levels (as estimated by ELISA) and time of progression of PDAC. Patients with late progression tend to show lower plasma FN1 levels.

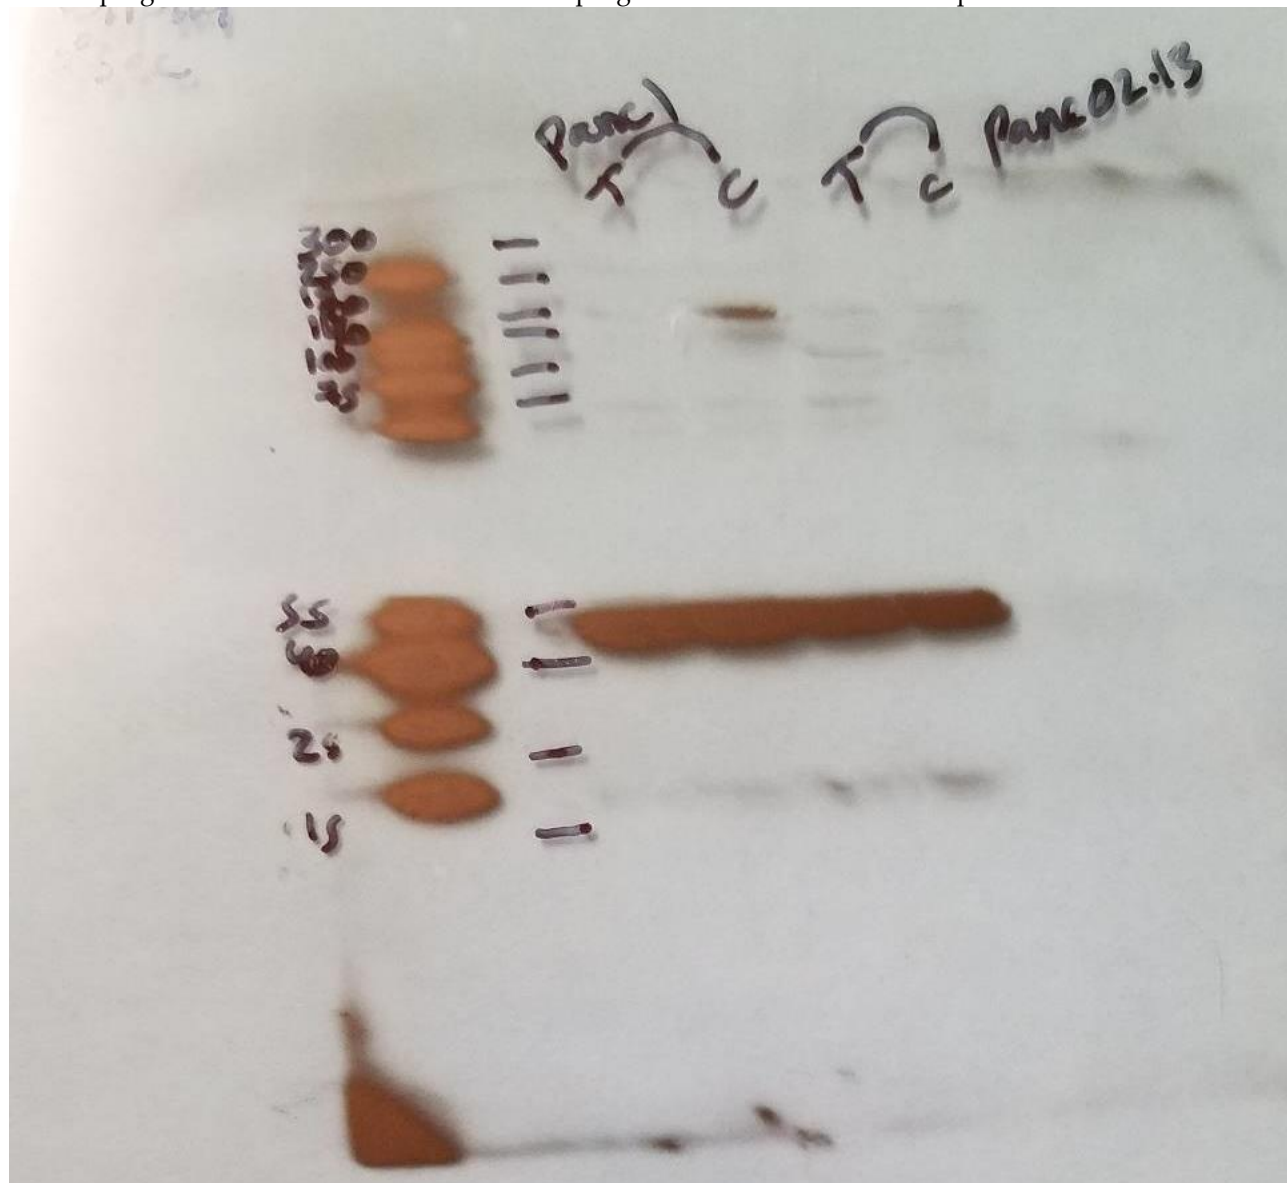

**Figure S7.** Primary Data for Supplementary Figure S2, panel C

### ***RNA extraction and cDNA transcription***

Total RNA was isolated from PANC-1 cells using RNeasy Mini kit (Qiagen, Hilden, Germany) as per standard protocol provided by the manufacturer, with on-column DNA digestion. RNA integrity and concentration was analyzed using nanodrop ND-1000 v 3.8.1 spectrophotometer. OD 260/280 values were between 2.1 and 2.4. Total RNA (100 ng) was used to obtain cDNA. Reverse-Transcription Reaction was performed following the standard protocol of RT<sup>2</sup> First Strand Kit (Qiagen, CA, USA). The cDNA obtained was analyzed by real time PCR using ABI 7900HT.

### ***Real Time-Polymerase Chain Reaction (RT-PCR) on EMT related genes***

To examine the effect of TGF $\beta$  and 9-cis RA on the expression of genes related to EMT, we used an RT<sup>2</sup> Profiler PCR Array for human EMT (Qiagen) consisting of quantitative RT-PCR of 84 EMT-related genes. The primers for FN1 (PPH001438-200), Col3A (PPH00439F-200), OGT (PPH01166A-200) and GAPDH (PPH00150F-200) were procured from Qiagen. Real-time PCR experiments were conducted using the SYBR Green PCR system (Applied Biosystems, Foster City, CA), with 40 cycles per sample. Cycling temperatures were as follows: 95°C for 10 min, 40 cycles at 95°C for 15 secs and then 60°C for 1 min. Data were analyzed using 2<sup>- $\Delta\Delta C_t$</sup>  method.

### ***Western blot analysis***

Cells were lysed in RIPA buffer (Alfa Aesar) and total protein was quantified using detergent compatible Bradford assay reagent (Pierce). 50  $\mu$ g of total protein from control (no treatments) and treated samples were loaded on to Novex Wedge well 4-12% Tris glycine polyacrylamide gel (Invitrogen) and electrophoresis was carried out at constant 100V until the blue dye reached the bottom of the gel. Proteins were transferred onto PVDF membrane at constant 15V overnight in the cold room. Membranes were blocked with 5% non-fat milk (Lab Scientific Inc.) in PBS for 1 hour. All primary antibodies (Abcam- rabbit polyclonal human E-cadherin (1:1000), rabbit polyclonal human N-cadherin (1:1500), rabbit polyclonal human fibronectin was used at 1:1250 dilution while rabbit polyclonal human collagen III was used at 1:1000 dilution) were prepared in blocking solution and incubated overnight at 4 °C. The membranes were washed and incubated with horseradish peroxidase (HRP) - conjugated secondary antibodies (goat anti rabbit IgG-HRP conjugate, Invitrogen) at 1:10,000 dilution in TTBS for 2 hours at room temperature. GAPDH was used as a loading control (rabbit polyclonal human GAPDH from Abcam) at 1:2500 dilution in TTBS solution. Finally, the membranes were washed and developed with enhanced chemiluminescence reagents (Amersham Corporation) and visualized using GE Amersham Imager 600. Densitometry was performed using Quantity One (BioRad) by obtaining the optical density of each band.

### ***Scratch Assay***

The cells were seeded in 12 well cell culture treated plates and allowed to grow until become 80-90% confluent followed by starvation for 24 h in FBS depleted medium. Following starvation, the scratch was made using 200  $\mu$ l pipette tip, cells were washed with PBS and TGF and 9-cis RA treatments were given fresh FBS depleted medium. The images were captured at 0, 24 and 48 h after treatments. The wound area was calculated using ImageJ software (<https://imagej.nih.gov/ij/>) and wound closure% was calculated using the following mentioned formula [1].

$$\text{Wound closure\%} = \left( \frac{(\text{Area at 0h} - \text{Area at (24 or 48 h) after treatment})}{\text{Area at 0h}} \right) \times 100\%$$

### ***9-cis RA MRM analysis in PANC-1 cells***

#### ***Metabolite extraction:***

Metabolite extraction was performed as per the protocol explained by Kane et al [2]. The cell pellets were sonicated in 25  $\mu$ L of water. Deuterium labelled all trans retinoic acid (Santa Cruz Biotechnology Inc, TX, USA) was used at 300 ng/mL as internal standard. 1 mL of 0.025 M KOH in ethanol was added to the homogenate and vortex for 10 sec. ACN (1mL) was added and vortex for at least 10 sec. Addition of 10 mL of hexane was followed by the addition of 60  $\mu$ L of 4 M HCl and the mixture was vortex well. The mixture was centrifuged for 3 min at 1000 X g to facilitate phase separation. Top organic layer containing 9-cis RA was separated and evaporated under a gentle

stream of nitrogen and re-suspended in 200  $\mu$ L of 50:50 methanol:water.

#### *Standards preparation and quantitation:*

A stock solution of D5-(at) RA (internal standard) and 9-cis retinoic acid were prepared in 90:10 of methanol:water at a concentration of 1  $\mu$ g/mL. Calibration curve solutions with concentrations from 10 ng/mL to 2000 ng/mL of were prepared from the stock solutions.

#### *LC-MRM MS conditions:*

The extracted metabolites were resolved on a BEH C18 column using the gradient method shown in Supplementary Figure S3, panel B. A binary solvent comprising of water (with 0.2% formic acid) and methanol (with 0.2% formic acid) was used. MRM transitions that were used for quantitation are detailed in Supplementary Table S5. The data were normalized to total protein content and processed using Target Lynx 4.1 available within the Mass Lynx software suite (Waters Corporation).

#### *MRM-MS analysis of amino acids*

As indicated in the main text, intra cellular amino acids were extracted from PANC-1 cell pellets after various treatments and subjected to derivatization using phenylisothiocyanate (PITC) using commercially available protocol (Biocrates Absolute IDQ p180 kit). The Kit contains 7 calibrants, 3 QCs and an Internal standard, as solid lyophilized powders. The solutions were made as per the instructions of Biocrates module. 100  $\mu$ L of HPLC grade water was added to each of the seven calibrants (KIT2 cal1-cal7) and 3 QCs. Added 1200  $\mu$ L of HPLC grade water to lyophilized Internal standard. Shaken all the vials for 15 minutes at 1200 rpm and vortexed several times. Took 10  $\mu$ L from stock solution of respective vial (cell pellet as well) and added 10  $\mu$ L of internal standard stock solution. Dried under nitrogen evaporator. To this added, 50  $\mu$ L of 5% v/v PITC solution. Vortexed and sonicated for 5 min and kept standing for 20 min. Dried the solution using nitrogen evaporator. Added 300  $\mu$ L of extraction buffer to every vial. Shaken it well for 20 min. Taken 150  $\mu$ L of this solution and diluted it with 150  $\mu$ L of water solution. Transferred to the mass spec vial and run the sample.

#### *Validation of metabolites by targeted analysis in plasma samples*

Plasma samples were prepared as discussed under methods section in the main manuscript. Standards (acetyl CoA) were prepared at 1  $\mu$ g/mL concentration. Stock solutions of internal standards (adenosine-2-d2) were also prepared at 1  $\mu$ g/mL concentration. The LC gradient method along with the standard calibration curve was generated with at least 6 different concentrations of the standard as shown in Supplementary Figure S1. MRM transitions are detailed in Supplementary Table S5.
